# Supplementary material for: ATP Inhibits Breast Cancer Migration and Bone Metastasis through Down-Regulation of CXCR4 and Purinergic Receptor P2Y11
Source: MDPI journal article supplement (doi:10.3390/cancers13174293), 2021-08-26
Supplement: s1 [file s1]

# ATP Inhibits Breast Cancer Migration and Bone Metastasis Through Down-Regulation of CXCR4 and Purinergic Receptor P2Y11

Xiaowen Liu, Manuel A. Riquelme, Yi Tian, Francisca M. Acosta, Sumin Gu and Jean X. Jiang

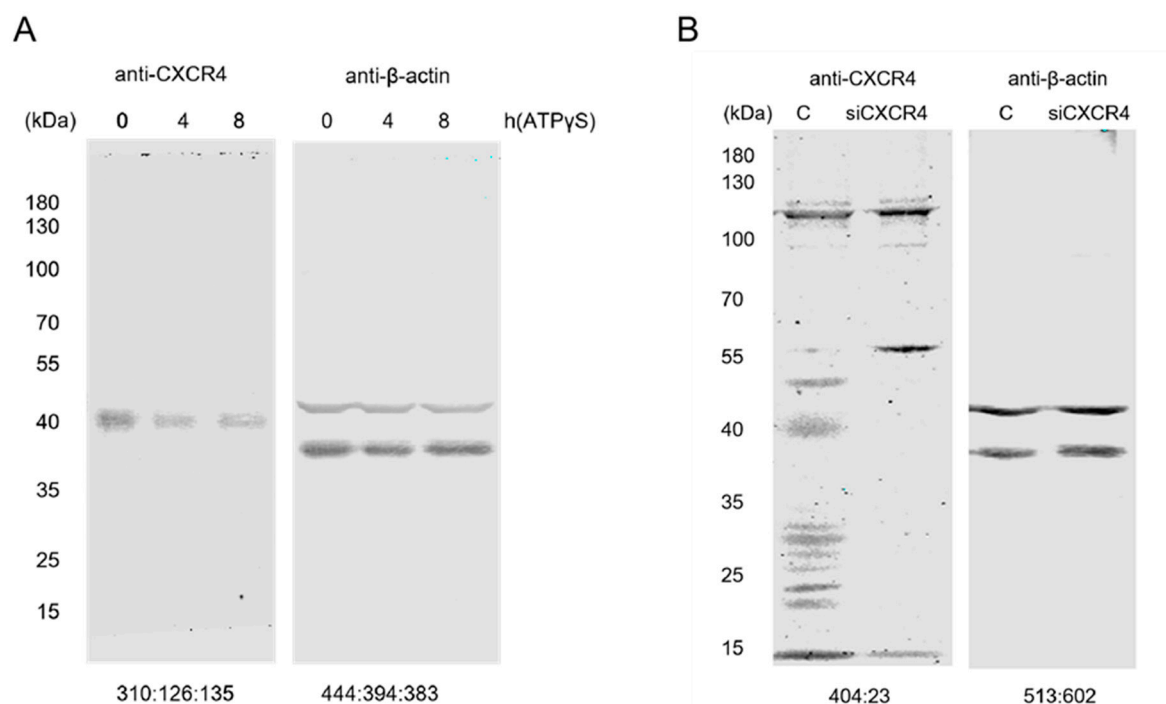

**Figure S1.** Western blot data. **(A)** MDA-BoM-1833 cells were treated with 100  $\mu$ M ATP $\gamma$ S for 4 or 8 h and level of CXCR4 protein was determined by Western blotting with anti-CXCR4 or  $\beta$ -actin antibody (upper band is  $\beta$ -actin and lower band is GAPDH). **(B)** MDA-BoM-1833 cells were transfected with CXCR4 siRNA and 48 h after transfection, Western blotting was performed with anti-CXCR4 or  $\beta$ -actin antibody (upper band is  $\beta$ -actin and lower band is GAPDH).

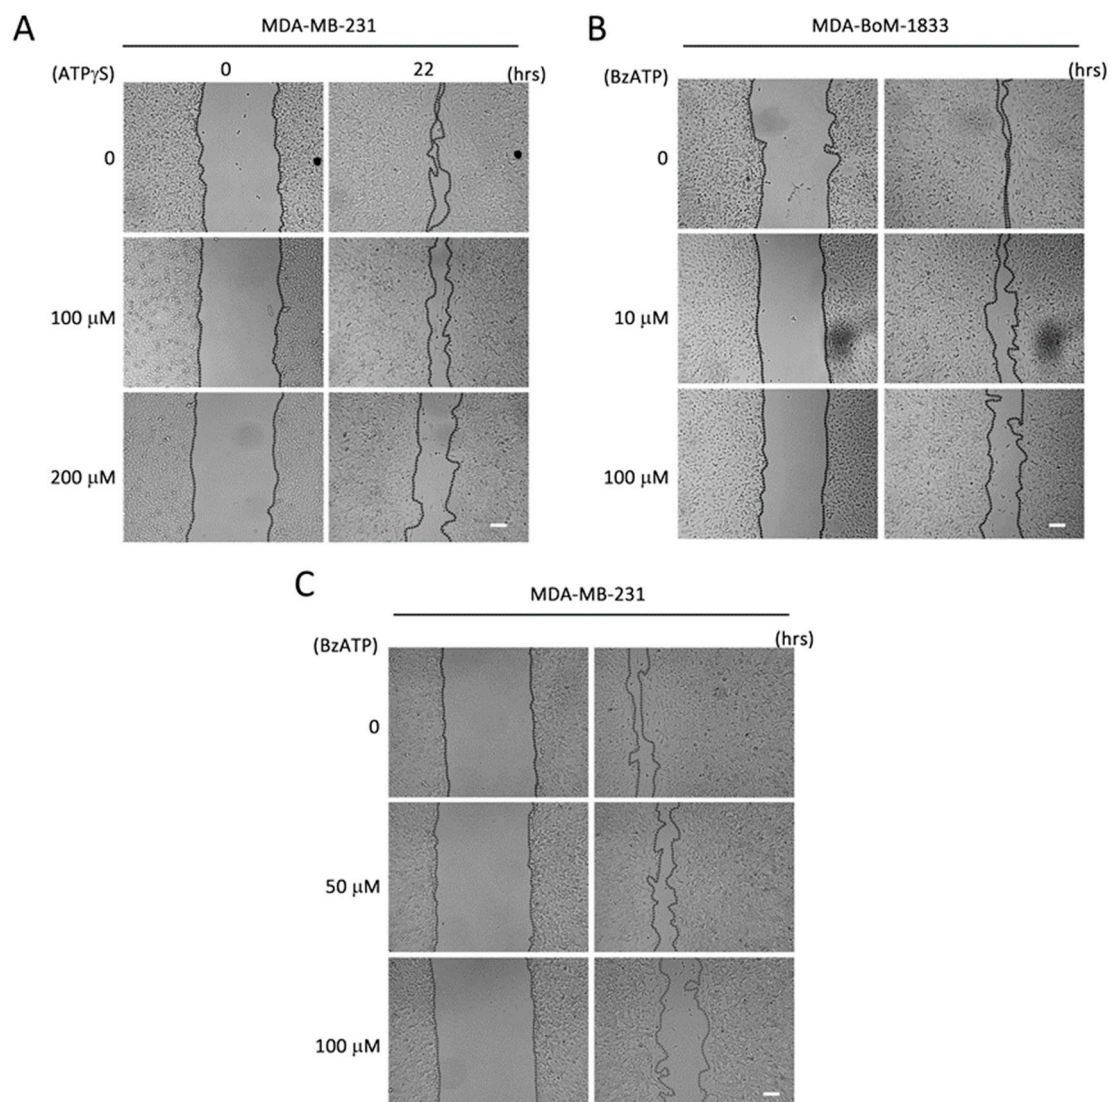

**Figure S2.** Representative wound-healing assay images. **(A)** Representative scratch assay pictures of wound healing assay which was performed in MDA-MB-231 cells after treatment with various concentrations of ATP $\gamma$ S (quantified data showed in Figure 1D). **(B)** Representative scratch assay pictures of wound healing assay which was performed in MDA-BoM-1833 cells after treatment with various concentrations of BzATP (quantified data showed in Figure 2A). **(C)** Representative scratch assay pictures of wound healing assay which was performed in MDA-BoM-1833 cells after treatment with various concentrations of BzATP (quantified data showed in Figure 2D).
